# Supplementary material
Source: ML conference proceedings conference paper supplement (https://openreview.net/forum?id=Xu5a2WU3Ew)

Estimate

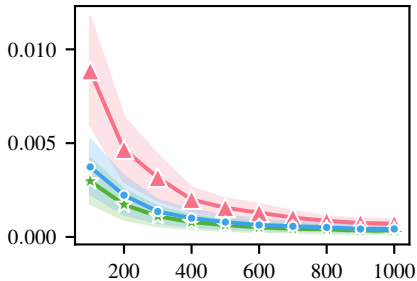Number of samples ( $n$ )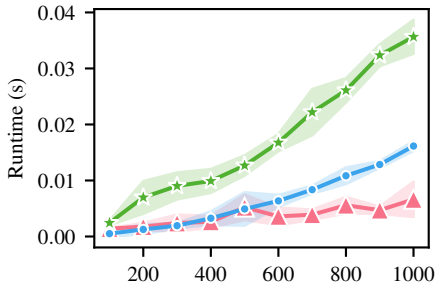

Supplement: supplementary_material [file attachment]

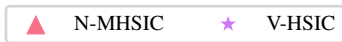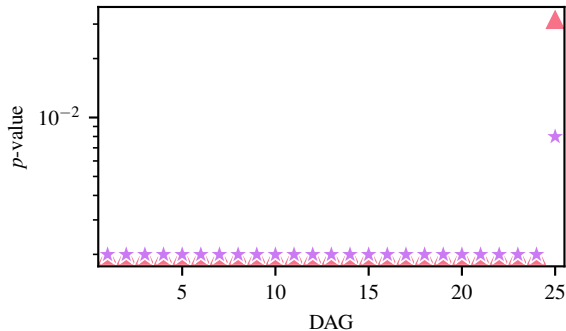

Supplement: supplementary_material [file attachment]

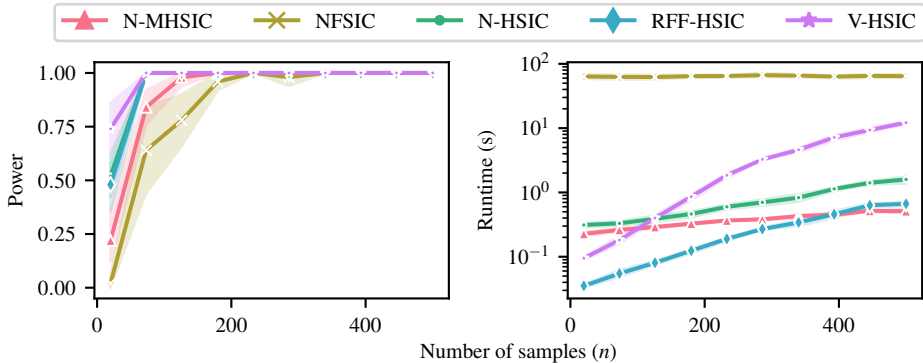

Supplement: supplementary_material [file attachment]

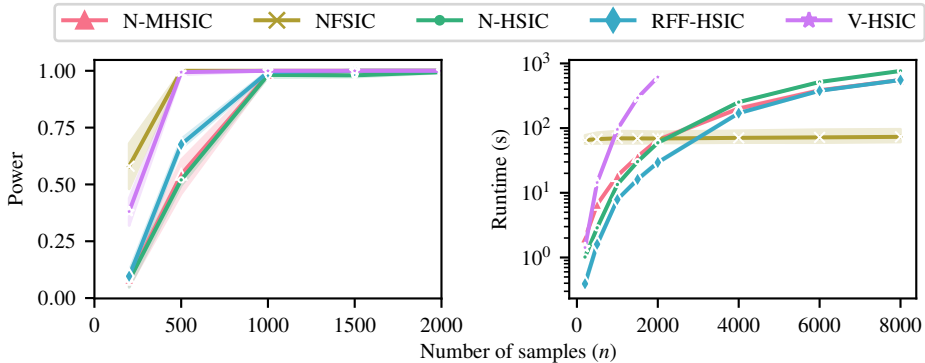

Supplement: supplementary_material [file attachment]

Ratio of correct DAGs

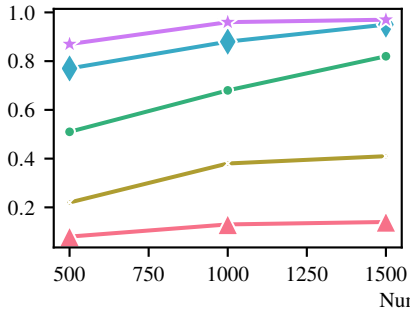

Runtime (s)

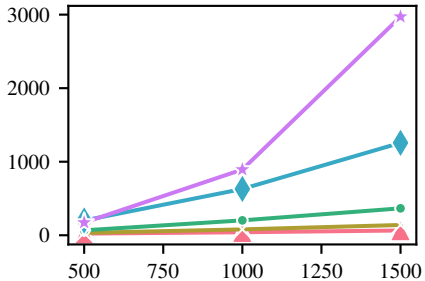

Supplement: supplementary_material [file attachment]

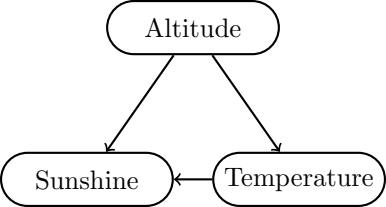

Supplement: supplementary_material [file attachment]
